# Supplementary material for: A dynamically stable self-assembled CoFe (oxy)hydroxide-based nanocatalyst with boosted electrocatalytic performance for the oxygen-evolution reaction
Source: Royal Society of Chemistry journal article supplement (doi:10.1039/d4ta01848f), 2024-01-01
Supplement: d4ta01848f1.pdf [file d4ta01848f1.pdf]

## Electronic Supplementary Information

### A dynamically stable self-assembled CoFe (oxy)hydroxide-based nancatalyst with boosted electrocatalytic performance for oxygen-evolution reaction

Ming Zhu<sup>a,b,1</sup>, Hengyue Xu<sup>c,1</sup>, Jie Dai<sup>d</sup>, Daqin Guan<sup>c\*</sup>, Zhiwei Hu<sup>e</sup>, Sixuan She<sup>f</sup>, Chien-Te Chen<sup>g</sup>, Ran Ran<sup>a\*</sup>, Wei Zhou<sup>a</sup>, and Zongping Shao<sup>c\*</sup>

<sup>a</sup> State Key Laboratory of Materials-Oriented Chemical Engineering, College of Chemical Engineering, Nanjing Tech University, Nanjing, 211800, China

<sup>b</sup> Institute for Smart City of Chongqing University in Liyang, Chongqing University, Jiangsu, 213300, China

<sup>c</sup> WA School of Mines: Minerals, Energy and Chemical Engineering, Curtin University, Perth, Western Australia 6845, Australia

<sup>d</sup> School of Environmental Science and Engineering, Shanghai Jiao Tong University, Shanghai, 200240, China

<sup>e</sup> Max-Planck-Institute for Chemical Physics of Solids, Nöthnitzer Str. 40, Dresden 01187, Germany.

<sup>f</sup> Department of Applied Physics and Materials Research Center, The Hong Kong Polytechnic University, Hung Hom, Kowloon, Hong Kong

<sup>g</sup> National Synchrotron Radiation Research Center, 101 Hsin-Ann Road, Hsinchu 30076, Taiwan.

\*Email: daqin.guan@curtin.edu.au, ranr@njtech.edu.cn, zongping.shao@curtin.edu.au

<sup>1</sup> These authors contributed equally: Ming Zhu, Hengyue Xu

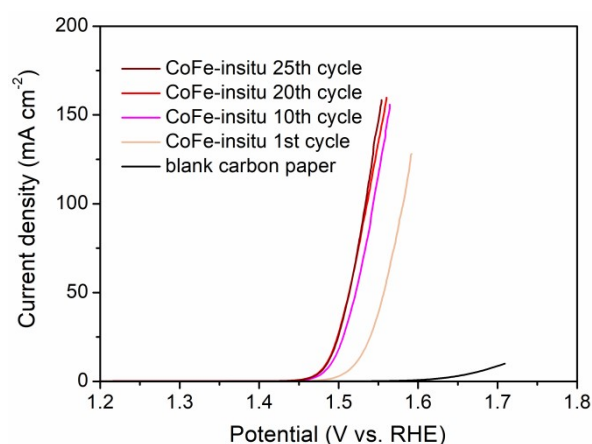

Figure S1. The LSV curves of CoFe-insitu during electrodeposition in 1M KOH.

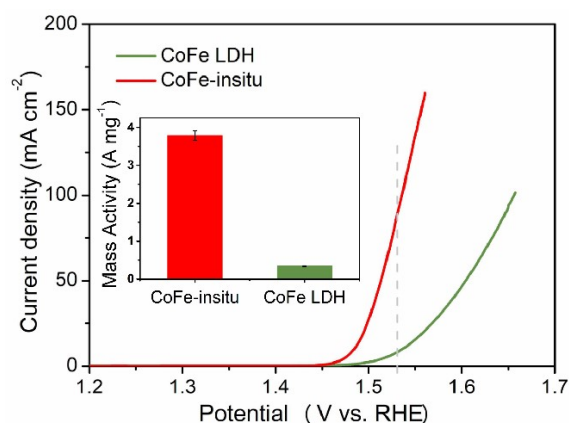

Figure S2. The OER polarization curves and mass activities of CoFe-insitu and CoFe LDH with the same mass loading ( $0.0146 \text{ mg cm}^{-2}$  metal on the electrode) at  $\eta=0.3 \text{ V}$ .

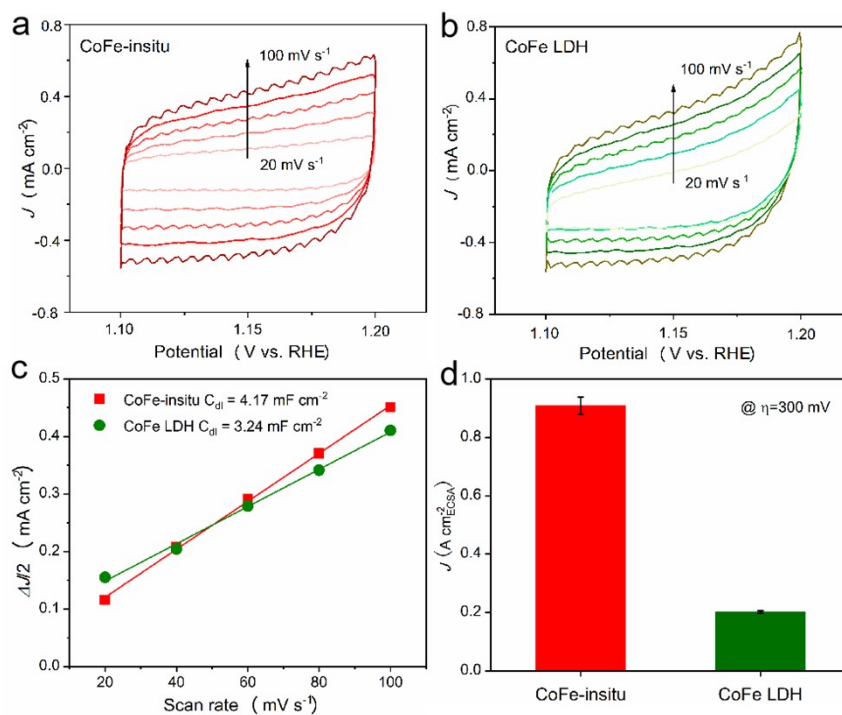

Figure S3. CV measurements in a non-faradic current region at scan rates of 20, 40, 60, 80 and  $100 \text{ mV s}^{-1}$  of a) CoFe-insitu, b) CoFe LDH. c) Linear fitting of the capacitive currents versus CV scan rates for CoFe-insitu and CoFe LDH. d) Specific activity normalized to ECSA of CoFe-insitu and CoFe LDH catalysts at  $\eta = 0.3 \text{ V}$ .

Table S1. The OER mass activity of CoFe-insitu and benchmarked data of state-of-the-art transition metal-based catalysts in alkaline electrolyte.

| Electrocatalysts | Mass activity                                       | Electrolyte | References       |
|------------------|-----------------------------------------------------|-------------|------------------|
| CoFe-insitu      | $3.78 \text{ A mg}^{-1}$ ( $\eta = 0.3 \text{ V}$ ) | 1 M KOH     | <b>This work</b> |

|                                                                                                       |                                                         |                  |           |
|-------------------------------------------------------------------------------------------------------|---------------------------------------------------------|------------------|-----------|
| <b>tannin-NiFe complex</b>                                                                            | 9.17 A mg <sup>-1</sup> ( $\eta = 0.3$ V)               | <b>1 M KOH</b>   | <b>1</b>  |
| <b>NiFe-based surface-mounted metal–organic frameworks composed of deprotonated terephthalic acid</b> | 2.9 A mg <sup>-1</sup> ( $\eta = 0.3$ V)                | <b>0.1 M KOH</b> | <b>2</b>  |
| <b>amorphous NiFeOOH on surface activated carbon fiber paper</b>                                      | 2.527 A mg <sup>-1</sup> ( $\eta = 0.27$ V)             | <b>1 M KOH</b>   | <b>3</b>  |
| <b>Ni/Co surface-mounted metal–organic framework derivatives</b>                                      | 2.5 A mg <sup>-1</sup> ( $\eta = 0.3$ V)                | <b>0.1 M KOH</b> | <b>4</b>  |
| <b>Lattice-strained NiFe MOFs</b>                                                                     | 2 A mg <sup>-1</sup> <sub>metal</sub> ( $\eta = 0.3$ V) | <b>0.1 M KOH</b> | <b>5</b>  |
| <b>atomically thin FeCoNi ternary (oxy)hydroxide nanosheets</b>                                       | 1.931 A mg <sup>-1</sup> ( $\eta = 0.33$ V)             | <b>1 M KOH</b>   | <b>6</b>  |
| <b>amorphous nanocages of Cu-Ni-Fe hydr(oxy)oxide</b>                                                 | 1.465 A mg <sup>-1</sup> ( $\eta = 0.3$ V)              | <b>1 M KOH</b>   | <b>7</b>  |
| <b>Reduced La<sub>0.2+2x</sub>Ca<sub>0.7-2x</sub>Ti<sub>1-x</sub>Co<sub>x</sub>O<sub>3</sub></b>      | 1.7 A mg <sup>-1</sup> ( $\eta = 0.45$ V)               | <b>1 M KOH</b>   | <b>8</b>  |
| <b>SrCo<sub>0.9</sub>Fe<sub>0.1</sub>O<sub>3-<math>\delta</math></sub> nanofilms on nickel foam</b>   | 1000 A g <sup>-1</sup> ( $\eta = 0.55$ V)               | <b>1 M KOH</b>   | <b>9</b>  |
| <b>Sr<sub>2</sub>Co<sub>1.6</sub>Fe<sub>0.4</sub>O<sub>4.8</sub>S<sub>0.2</sub></b>                   | 881 A g <sup>-1</sup> ( $\eta = 0.42$ V)                | <b>1 M KOH</b>   | <b>10</b> |
| <b>P–Ni<sub>0.75</sub>Fe<sub>0.25</sub>Se<sub>2</sub></b>                                             | 328.19 A g <sup>-1</sup> ( $\eta = 0.5$ V)              | <b>1 M KOH</b>   | <b>11</b> |
| <b><math>\gamma</math>-CoOOH nanosheet</b>                                                            | 66.6 A g <sup>-1</sup> ( $\eta = 0.3$ V)                | <b>1 M KOH</b>   | <b>12</b> |

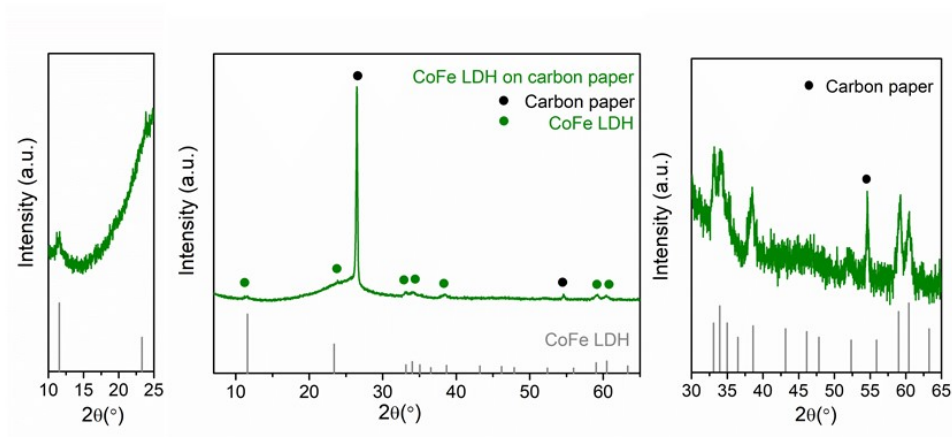

Figure S4. XRD figure of CoFe LDH.

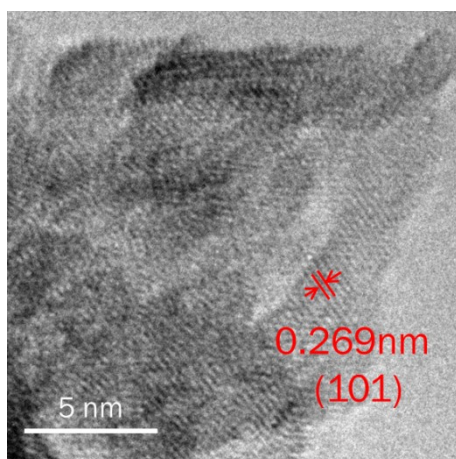

Figure S5. TEM figure of CoFe LDH

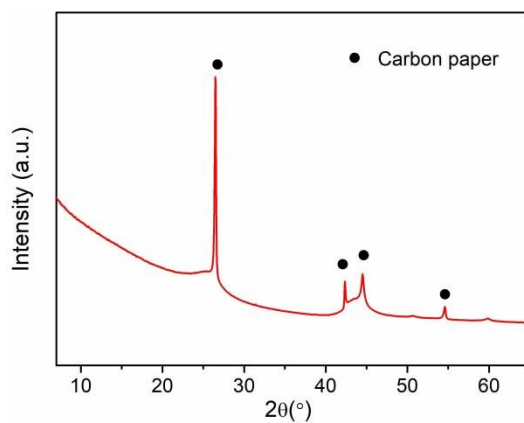

Figure S6. Synchrotron X-ray powder diffraction spectrum of CoFe-insitu

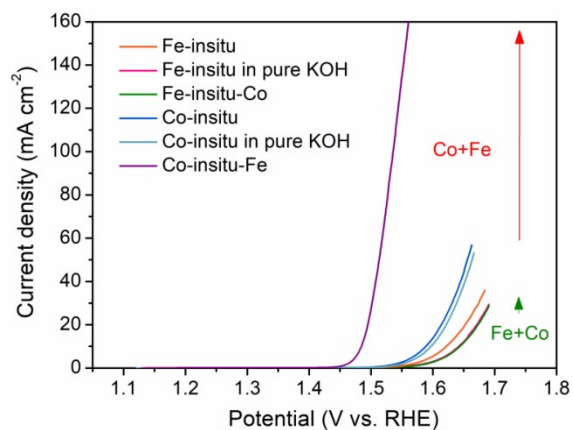

Figure S7. The LSV curves of Co-insitu-Fe and Fe-insitu-Co prepared by two steps in 1 M KOH.

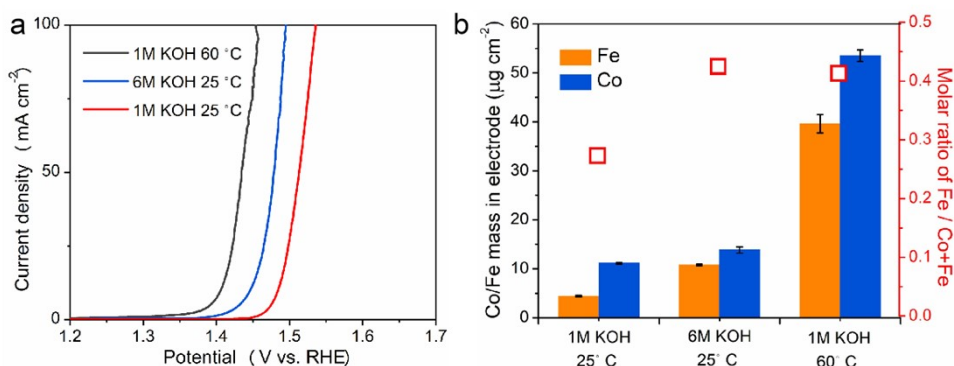

Figure S8 a) The OER polarization curves, b) mass loading of Co and Fe, and molar ratio of Fe/Co+Fe of CoFe-insitu samples synthesized under different KOH concentrations (1M, 6M) and temperatures (25°C, 60°C).

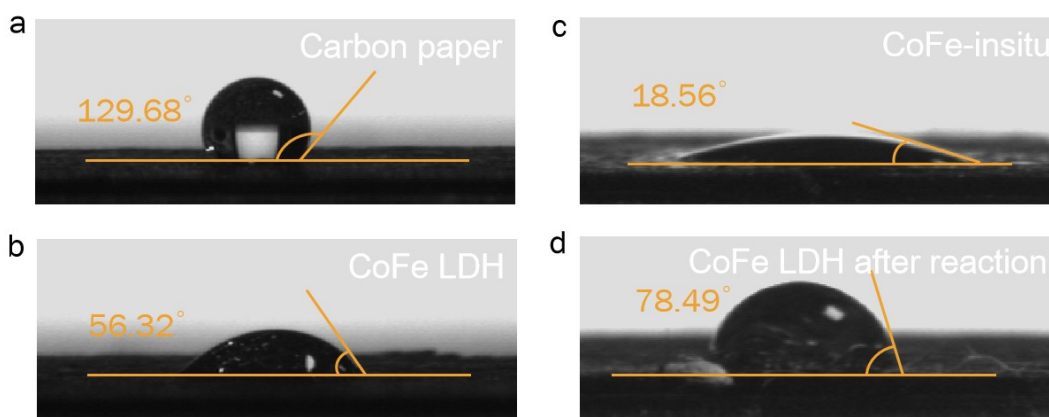

Figure S9. Contact angles of water towards a) blank carbon paper, b) CoFe LDH, c) CoFe-insitu and d) CoFe LDH after OER reaction.

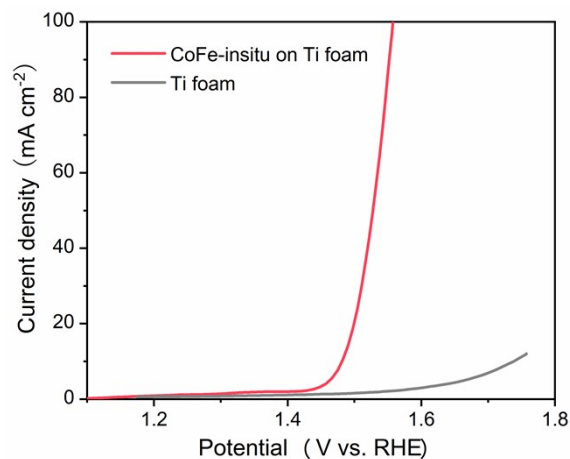

Figure S10. The OER polarization curves of the CoFe-insitu on Ti foam and Ti foam.

Table S2. The elemental concentration on the surface of CoFe-insitu pre and post stability test detect by XPS.

|       | CoFe-insitu      |                |          | CoFe-insitu post stability test |                |          |
|-------|------------------|----------------|----------|---------------------------------|----------------|----------|
|       | Atomic conc. [%] | Mass conc. [%] | Fe/Fe+Co | Atomic conc. [%]                | Mass conc. [%] | Fe/Fe+Co |
| O 1s  | 21.6             | 24.1           |          | 23.8                            | 23.3           |          |
| Fe 2p | 1.5              | 5.7            | 0.456    | 3.5                             | 12.1           | 0.472    |
| Co 2p | 1.7              | 7.1            |          | 4.0                             | 14.3           |          |
| C 1s  | 75.2             | 63.1           |          | 68.7                            | 50.4           |          |

## References

1. Y. Shi, Y. Yu, Y. Liang, Y. Du and B. Zhang, *Angew. Chem. Int. Ed.*, 2019, **58**, 3769-3773.
2. S. Hou, W. Li, S. Watzele, R. M. Kluge, S. Xue, S. Yin, X. Jiang, M. Döblinger, A. Welle, B. Garlyyev, M. Koch, P. Müller-Buschbaum, C. Wöll, A. S. Bandarenka and R. A. Fischer, *Adv. Mater.*, 2021, **33**, 2103218.
3. P. Thangavel, G. Kim and K. S. Kim, *J. Mater. Chem. A*, 2021, **9**, 14043-14051.
4. W. Li, S. Watzele, H. A. El-Sayed, Y. Liang, G. Kieslich, A. S. Bandarenka, K. Rodewald, B. Rieger and R. A. Fischer, *J. Am. Chem. Soc.*, 2019, **141**, 5926-5933.
5. W. Cheng, X. Zhao, H. Su, F. Tang, W. Che, H. Zhang and Q. Liu, *Nature Energy*, 2019, **4**, 115-122.
6. Q. Zhang, N. M. Bedford, J. Pan, X. Lu and R. Amal, *Adv. Energy Mater.*, 2019, **9**, 1901312.
7. Z. Cai, L. Li, Y. Zhang, Z. Yang, J. Yang, Y. Guo and L. Guo, *Angew. Chem. Int. Ed.*, 2019, **58**, 4189-4194.
8. S. Zuo, Y. Liao, C. Wang, A. B. Naden and J. T. S. Irvine, *Small*, 2024, **20**, 2308867.
9. G. Chen, Z. Hu, Y. Zhu, B. Gu, Y. Zhong, H.-J. Lin, C.-T. Chen, W. Zhou and Z. Shao, *Adv. Mater.*, 2018, **30**, 1804333.

10. S. She, Y. Zhu, H. A. Tahini, Z. Hu, S.-C. Weng, X. Wu, Y. Chen, D. Guan, Y. Song, J. Dai, S. C. Smith, H. Wang, W. Zhou and Z. Shao, *Appl. Phys. Rev.*, 2021, **8**, 11407.
11. Y. Huang, L.-W. Jiang, B.-Y. Shi, K. M. Ryan and J.-J. Wang, *Advanced Science*, 2021, **8**, 2101775.
12. J. Huang, J. Chen, T. Yao, J. He, S. Jiang, Z. Sun, Q. Liu, W. Cheng, F. Hu, Y. Jiang, Z. Pan and S. Wei, *Angew. Chem. Int. Ed.*, 2015, **54**, 8722-8727.
